# Supplementary material
Source: PubMed Central journal article supplement (PMC3606053)
Supplement: NIHMS448621-supplement-supplement_1.pdf [file NIHMS448621-supplement-supplement_1.pdf]

Table 1S. Sputum and peripheral cytokines and chemokines tested that did not have a significant relationship to PASP and TRV.

|                    | PASP for induced<br>sputum<br>R (p-value) | PASP for<br>plasma<br>R (p-value) | TRV for induced<br>sputum<br>R (p-value) | TRV for<br>plasma<br>R (p-value) |
|--------------------|-------------------------------------------|-----------------------------------|------------------------------------------|----------------------------------|
| Log IL-1 $\beta$   | 0.19 (0.07)                               | -0.05 (0.75)                      | 0.18 (0.30)                              | -0.09 (0.54)                     |
| Log IL-6           | 0.15 (0.15)                               | 0.04 (0.75)                       | 0.11 (0.30)                              | 0.09 (0.42)                      |
| Log IL-15          | 0.05 (0.67)                               | 0.12 (0.35)                       | 0.06 (0.59)                              | 0.11 (0.38)                      |
| Log TNF- $\alpha$  | 0.19 (0.07)                               | 0.17 (0.08)                       | 0.20 (0.051)                             | 0.18 (0.07)                      |
| Log IFN- $\gamma$  | 0.05 (0.64)                               | See Table 1                       | 0.06 (0.55)                              | See Table 1                      |
| Log fractalkine    | 0.08 (0.43)                               | 0.05 (0.62)                       | 0.07 (0.49)                              | 0.06 (0.54)                      |
| Log FGF            | 0.12 (0.32)                               | 0.06 (0.52)                       | 0.13 (0.29)                              | 0.08 (0.41)                      |
| Log MIP-1 $\alpha$ | 0.12 (0.25)                               | (0.24)*                           | 0.15 (0.15)                              | (0.23)*                          |
| Log MCP-1          | -0.004 (0.97)                             | 0.03 (0.75)                       | -0.02 (0.86)                             | 0.04 (0.46)                      |
| Log VEGF           | 0.06 (0.59)                               | 0.15 (0.16)                       | 0.05 (0.61)                              | 0.15 (0.15)                      |
| Log CCL-5          | (0.48)*                                   | 0.03 (0.78)                       | (0.62)*                                  | 0.03 (0.80)                      |

Abbreviations: CC chemokine-ligand, CCL; fibroblast growth factor, FGF; IL, interleukin; IFN, interferon; macrophage inflammatory protein, MIP; monocyte chemotactic protein, MCP; PASP, pulmonary artery systolic pressure; TNF, tumor necrosis factor; TRV, tricuspid regurgitant velocity; vascular endothelial growth factor, VEGF.

\*p-value for t-test of PASP and TRV by cytokine dichotomized above and below the median cohort value.
